# Supplementary material for: Large-scale Metabolomic Profiling Identifies Novel Biomarkers for Incident Coronary Heart Disease
Source: PLoS Genet. 2014 Dec 11;10(12):e1004801. doi: 10.1371/journal.pgen.1004801 (PMC4263376; doi:10.1371/journal.pgen.1004801)
Supplement: S3 Table — Association between metabolites replicated in the univariable analysis and CHD in ULSAM and TwinGene, adjusted for established risk factors. (XLSX) [file pgen.1004801.s007.xlsx]

## Sheet: Sheet1
Study	Strata	N. CHD Event/Non-event	Metabolite *
			MG 18:2		Monosaccharides		LysoPC 18:2		Cinnamic Acid Derivatives		SM 28:1
			HR	P-value	HR	P-value	HR	P-value	HR	P-value	HR	P-value
			(95% CIs)		(95% CIs)		(95% CIs)		(95% CIs)		(95% CIs)
ULSAM	All	127/991	1.11	0.27	1.19	0.05	0.84	0.04	0.85	0.09	0.79	0.01
			(0.92-1.35)		(1.00-1.42)		(0.71-0.99)		(0.71-1.02)		(0.66-0.94)
TwinGene	All	225/1507	1.24	0.01	1.06	0.45	-	-	0.92	0.25	0.9	0.18
			(1.04-1.47)		(0.91-1.25)				(0.80-1.06)		(0.78-1.05)
	< 65 years old	64/470	1.47	0.01	1.16	0.32	1.04	0.74	0.92	0.56	0.92	0.55
			(1.09-1.98)		(0.87-1.55)		(0.82-1.33)		(0.69-1.22)		(0.70-1.21)
	65- 70 years old	51/464	1.15	0.39	1.04	0.78	1.19	0.27	0.78	0.09	0.84	0.21
			(0.84-1.56)		(0.78-1.38)		(0.88-1.60)		(0.59-1.04)		(0.64-1.10)
	> 70 years old	140/573	1.16	0.19	1.05	0.66	0.76	0.008	1.02	0.81	0.93	0.5
			(0.93-1.44)		(0.85-1.29)		(0.63-0.93)		(0.84-1.25)		(0.76-1.14)
	P-value for age*metabolic feature interaction	-	0.31		0.45		0.02		0.25		0.53
* Values are from Cox proportional hazards analyses for a SD increment of the metabolic feature adjusted by age, sex (only in TwinGene), systolic blood pressure, body mass index, current smoking, antihypertensive treatment, LDL cholesterol, HDL cholesterol, log-triglycerides and diabetes at baseline.
Associations in bold have P-value < 0.05.
