# Supplementary material for: Large-scale Metabolomic Profiling Identifies Novel Biomarkers for Incident Coronary Heart Disease
Source: PLoS Genet. 2014 Dec 11;10(12):e1004801. doi: 10.1371/journal.pgen.1004801 (PMC4263376; doi:10.1371/journal.pgen.1004801)
Supplement: S5 Table — Reclassification table in TwinGene when four metabolites are added to established risk factors. (XLSX) [file pgen.1004801.s009.xlsx]

## Sheet: Sheet1
Original risk categories	Updated Risk Categories:
	Base risk* + MG 18:2 + LysoPC 18:2 + LysoPC 18:1 + SM 28:1 + LysoPC 18:1*age + LysoPC 18:2*age
	≤10%	11% to ≤20%	>20%
Participants with CHD events
≤10%	0.527	0.08	0.004
11% to ≤20%	0.042	0.206	0.061
>20%	0	0.004	0.076
Participants without CHD events
≤10%	0.849	0.018	0.001
11% to ≤20%	0.019	0.081	0.012
>20%	0	0.004	0.017
Net reclassification for participants with CHD: 9.9%
Net reclassification for participants without CHD: -0.7%
* Base risk obtained by a Cox proportional hazards analysis adjusted by age, sex, systolic blood pressure, current smoking, antihypertensive treatment, total cholesterol, HDL cholesterol and diabetes at baseline. The model to obtain the updated risk adds the metabolic feature to the base model. Since the maximum follow-up time is 6.6 years we predicted the 10-year survival by fitting smooth splin…
